# Supplementary material for: Synthesis and Characterization of Novel Ruthenium(III) Complexes with Histamine
Source: Hindawi journal article supplement (doi:10.1155/2010/183097), 2010-01-01
Supplement: f1 [file 183097.f1.pdf]

data\_k825

\_publ\_contact\_author\_name 'Jakob Kljun'

\_publ\_contact\_author\_address

;

Faculty of Chemistry and Chemical Technology

University of Ljubljana

A\u0161ker\u0161ceva 5, P. O. Box 537

1000 Ljubljana

Slovenia

;

\_publ\_contact\_author\_phone '+386 1 2419 100'

\_publ\_contact\_author\_fax '+386 1 2419 220'

\_publ\_contact\_author\_email 'jakob.kljun@fkkt.uni-lj.si'

\_publ\_requested\_journal 'Bioinorganic Chemistry and Applications'

\_publ\_author\_name 'Kljun, J.', 'Petri\u0107ek, S.', '\u0161igon, D.', 'Hudej, R.', 'Miklav\u010di\u0107, D.', 'Turel, I.'

\_audit\_creation\_method SHELXL-97

\_chemical\_name\_systematic

;

trans tetrachlorido-(dimethylsulfoxide)-(4-(2-ammonioethyl)imidazole) ruthenium(III) monohydrate

;

\_chemical\_name\_common ?

\_chemical\_melting\_point ?

\_chemical\_formula\_moiety ?

\_chemical\_formula\_sum

'C7 H18 Cl4 N3 O2 Ru S'

\_chemical\_formula\_weight 451.16

loop\_

\_atom\_type\_symbol

\_atom\_type\_description

\_atom\_type\_scatter\_dispersion\_real

\_atom\_type\_scatter\_dispersion\_imag

\_atom\_type\_scatter\_source

'C' 'C' 0.0033 0.0016

'International Tables Vol C Tables 4.2.6.8 and 6.1.1.4'

'H' 'H' 0.0000 0.0000

'International Tables Vol C Tables 4.2.6.8 and 6.1.1.4'

'N' 'N' 0.0061 0.0033

'International Tables Vol C Tables 4.2.6.8 and 6.1.1.4'

'O' 'O' 0.0106 0.0060
